# Supplementary material for: Intra-Genomic Internal Transcribed Spacer Region Sequence Heterogeneity and Molecular Diagnosis in Clinical Microbiology
Source: PubMed Central journal article supplement (PMC4632790; doi:10.3390/ijms161025067), 2015-10-22
Supplement: ijms-16-25067-s001.pdf [file ijms-16-25067-s001.pdf]

# Supplementary Information

## *Candida glabrata* PUMY010

Direct sequencing of PCR product

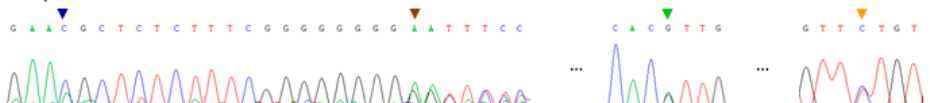

Sequencing of cloned PCR product

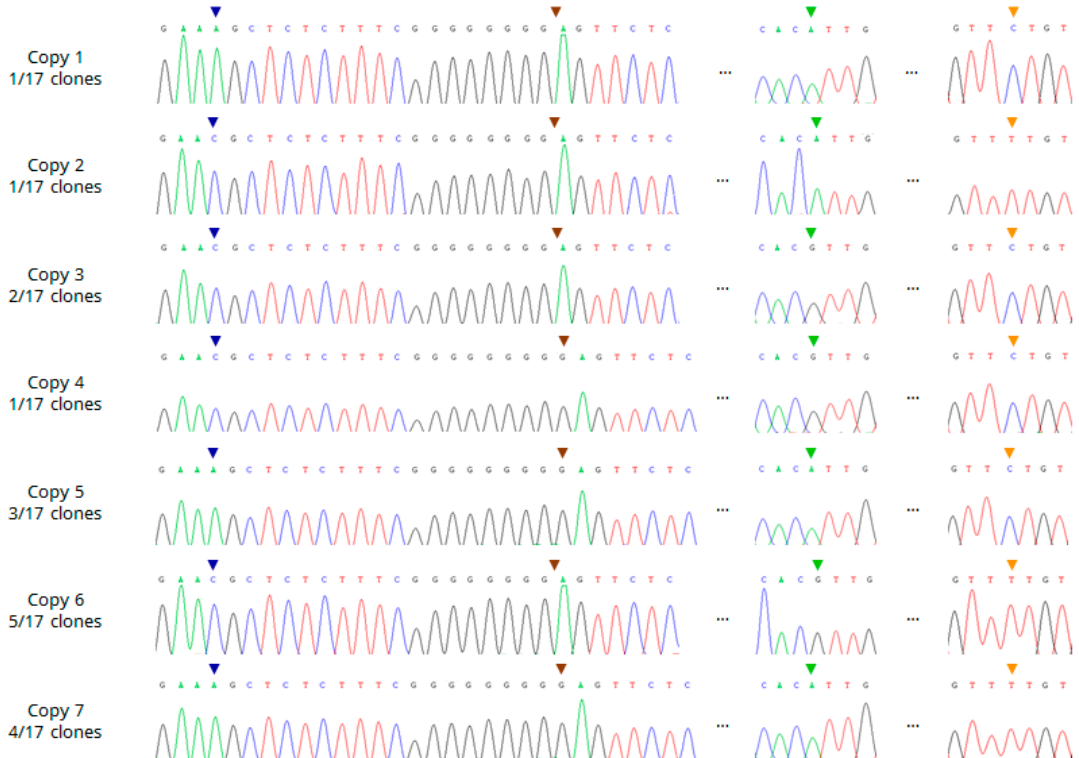

Polymorphisms

A-AC

C-AT

C-GC

CGGC

AGAC

C-GT

AGAT

## *Candida glabrata* PUMY011

Direct sequencing of PCR product

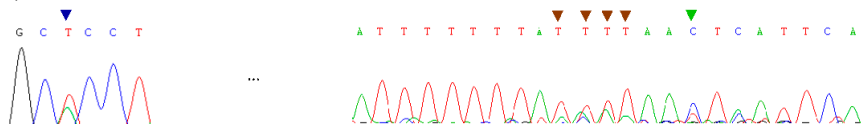

Sequencing of cloned PCR product

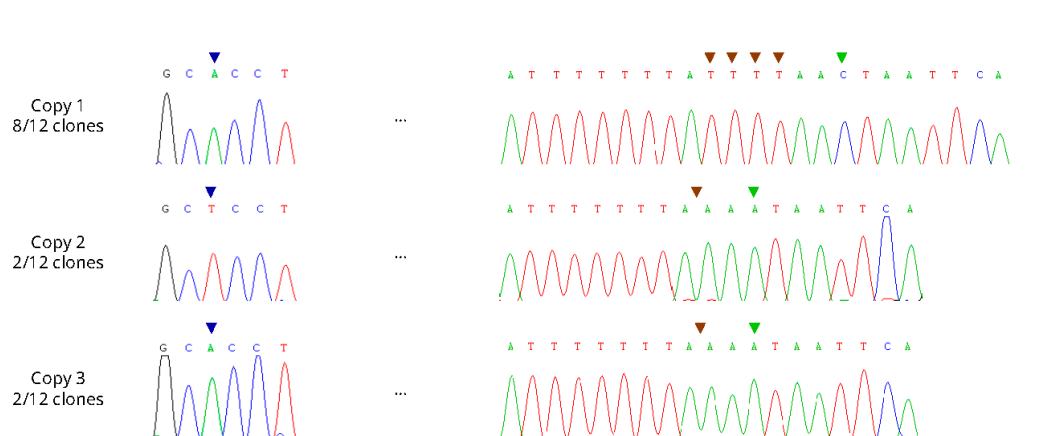

Polymorphisms

AT'C

T-A

A-A

T'=TTTT

Figure S1. Cont.

*Pichia (Candida) norvegensis* PUMY020

Direct sequencing of PCR product

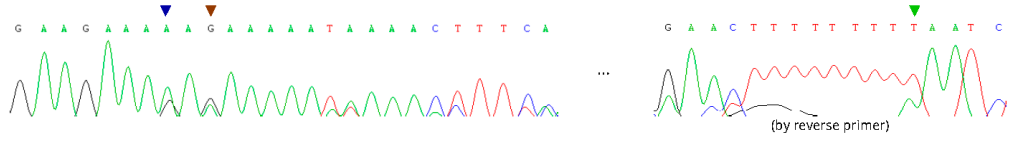

Sequencing of cloned PCR product

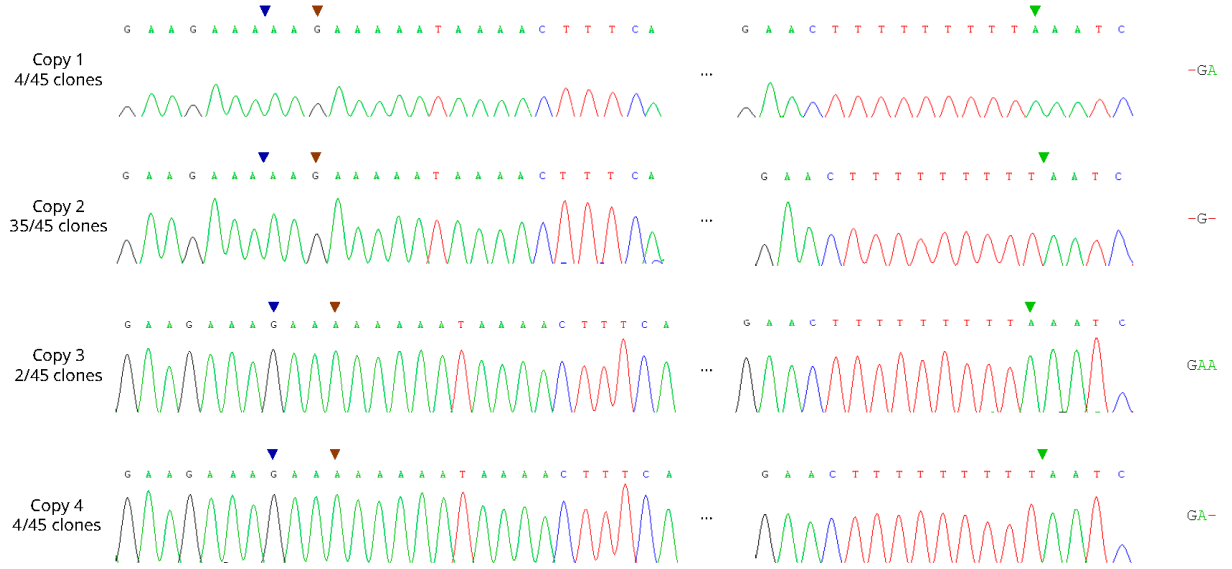

*Pichia (Candida) norvegensis* PUMY021

Direct sequencing of PCR product

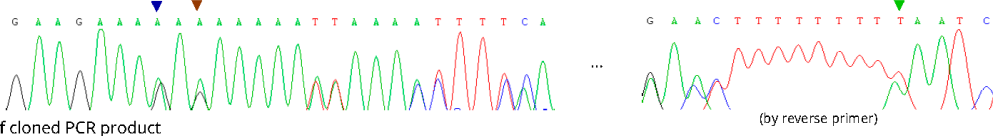

Sequencing of cloned PCR product

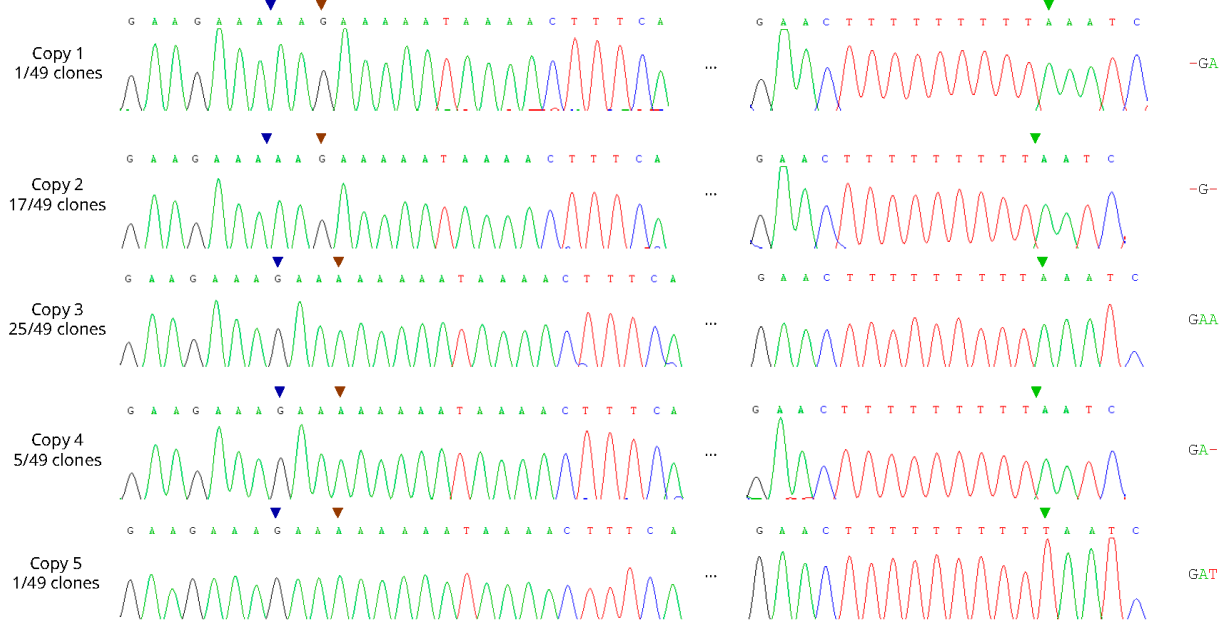

Figure S1. Cont.

*Candida tropicalis* PUMY040

## Direct sequencing of PCR product

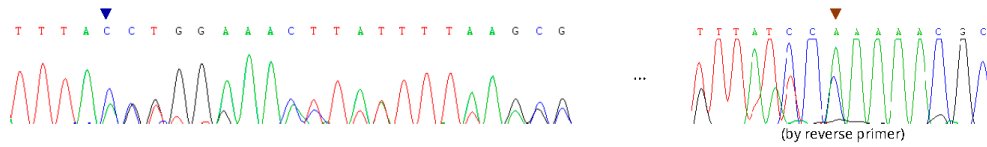

## Sequencing of cloned PCR product

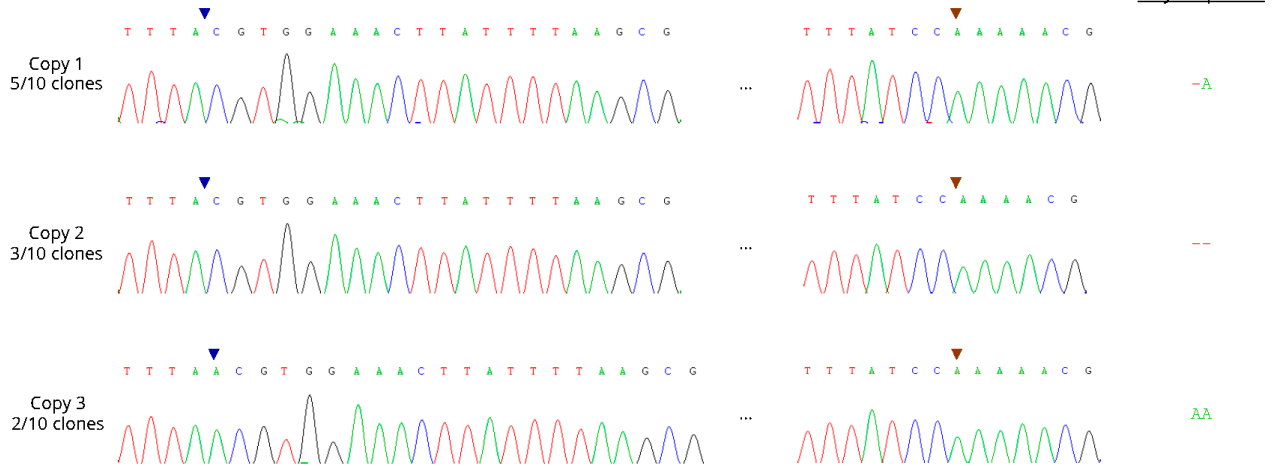*Saccharomyces cerevisiae* PUMY065

## Direct sequencing of PCR product

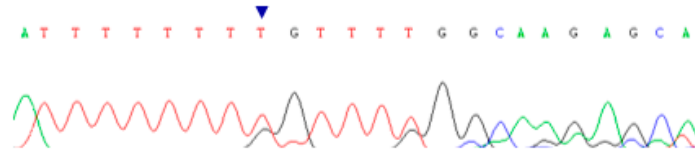

## Sequencing of cloned PCR product

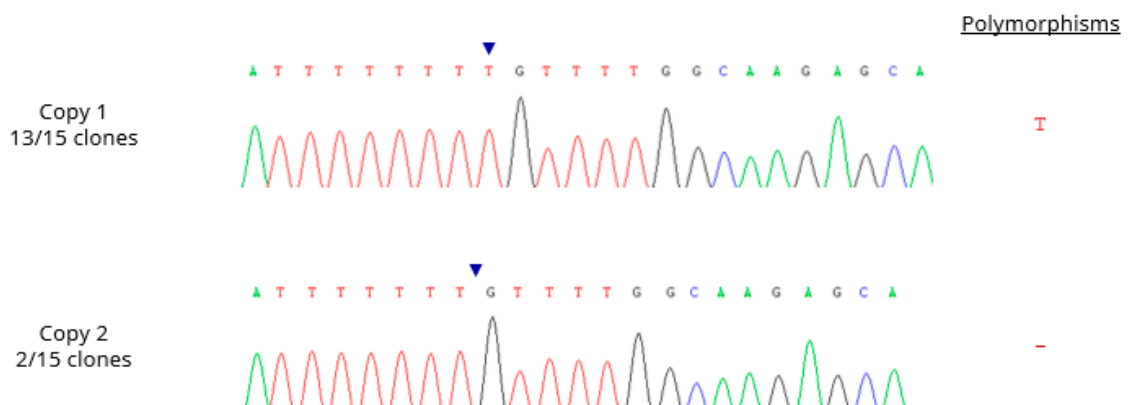

**Figure S1.** Sequencing electropherograms of the directly purified and cloned PCR products for the six yeast strains. The intra-genomic polymorphic sites are indicated by inverted arrowheads in different colors, and each color refers to a single polymorphic site.

|            |             | 18S nrDNA ITS1 |            |             |            |     |
|------------|-------------|----------------|------------|-------------|------------|-----|
| PUMY010-1  | AAGGATCATT  | AAAGAAATTT     | AATTGATTTG | TCTGAGCTCG  | GAGAGAGACA | 50  |
| PUMY010-2  | AAGGATCATT  | AAAGAAATTT     | AATTGATTTG | TCTGAGCTCG  | GAGAGAGACA | 50  |
| PUMY010-3  | AAGGATCATT  | AAAGAAATTT     | AATTGATTTG | TCTGAGCTCG  | GAGAGAGACA | 50  |
| PUMY010-4  | AAGGATCATT  | AAAGAAATTT     | AATTGATTTG | TCTGAGCTCG  | GAGAGAGACA | 50  |
| PUMY010-5  | AAGGATCATT  | AAAGAAATTT     | AATTGATTTG | TCTGAGCTCG  | GAGAGAGACA | 50  |
| PUMY010-6  | AAGGATCATT  | AAAGAAATTT     | AATTGATTTG | TCTGAGCTCG  | GAGAGAGACA | 50  |
| PUMY010-7  | AAGGATCATT  | AAAGAAATTT     | AATTGATTTG | TCTGAGCTCG  | GAGAGAGACA | 50  |
|            |             |                |            |             |            |     |
| PUMY010-1  | TCTCTGGGGA  | GGACCAAGTGT    | AGACACTCAG | GAGGTTCCCTA | AAATATTTTC | 100 |
| PUMY010-2  | TCTCTGGGGA  | GGACCAAGTGT    | AGACACTCAG | GAGGTTCCCTA | AAATATTTTC | 100 |
| PUMY010-3  | TCTCTGGGGA  | GGACCAAGTGT    | AGACACTCAG | GAGGTTCCCTA | AAATATTTTC | 100 |
| PUMY010-4  | TCTCTGGGGA  | GGACCAAGTGT    | AGACACTCAG | GAGGTTCCCTA | AAATATTTTC | 100 |
| PUMY010-5  | TCTCTGGGGA  | GGACCAAGTGT    | AGACACTCAG | GAGGTTCCCTA | AAATATTTTC | 100 |
| PUMY010-6  | TCTCTGGGGA  | GGACCAAGTGT    | AGACACTCAG | GAGGTTCCCTA | AAATATTTTC | 100 |
| PUMY010-7  | TCTCTGGGGA  | GGACCAAGTGT    | AGACACTCAG | GAGGTTCCCTA | AAATATTTTC | 100 |
|            |             |                |            |             |            |     |
| PUMY010-1  | TCTGCTGTGA  | ATGCCATTTT     | TCCTGCCTGC | GCTTAAGTGC  | GCGGTTGGTG | 150 |
| PUMY010-2  | TCTGCTGTGA  | ATGCCATTTT     | TCCTGCCTGC | GCTTAAGTGC  | GCGGTTGGTG | 150 |
| PUMY010-3  | TCTGCTGTGA  | ATGCCATTTT     | TCCTGCCTGC | GCTTAAGTGC  | GCGGTTGGTG | 150 |
| PUMY010-4  | TCTGCTGTGA  | ATGCCATTTT     | TCCTGCCTGC | GCTTAAGTGC  | GCGGTTGGTG | 150 |
| PUMY010-5  | TCTGCTGTGA  | ATGCCATTTT     | TCCTGCCTGC | GCTTAAGTGC  | GCGGTTGGTG | 150 |
| PUMY010-6  | TCTGCTGTGA  | ATGCCATTTT     | TCCTGCCTGC | GCTTAAGTGC  | GCGGTTGGTG | 150 |
| PUMY010-7  | TCTGCTGTGA  | ATGCCATTTT     | TCCTGCCTGC | GCTTAAGTGC  | GCGGTTGGTG | 150 |
|            |             |                |            |             |            |     |
| PUMY010-1  | GGTGTCTGTC  | AGTGGGGGGA     | GGGAGCCGAC | AAAGACCTGG  | GAGTGTGCGT | 200 |
| PUMY010-2  | GGTGTCTGTC  | AGTGGGGGGA     | GGGAGCCGAC | AAAGACCTGG  | GAGTGTGCGT | 200 |
| PUMY010-3  | GGTGTCTGTC  | AGTGGGGGGA     | GGGAGCCGAC | AAAGACCTGG  | GAGTGTGCGT | 200 |
| PUMY010-4  | GGTGTCTGTC  | AGTGGGGGGA     | GGGAGCCGAC | AAAGACCTGG  | GAGTGTGCGT | 200 |
| PUMY010-5  | GGTGTCTGTC  | AGTGGGGGGA     | GGGAGCCGAC | AAAGACCTGG  | GAGTGTGCGT | 200 |
| PUMY010-6  | GGTGTCTGTC  | AGTGGGGGGA     | GGGAGCCGAC | AAAGACCTGG  | GAGTGTGCGT | 200 |
| PUMY010-7  | GGTGTCTGTC  | AGTGGGGGGA     | GGGAGCCGAC | AAAGACCTGG  | GAGTGTGCGT | 200 |
|            |             |                |            |             |            |     |
| PUMY010-1  | GGATCTCTCT  | ATTCCAAAGG     | AGGTGTTTTA | TCACACGACT  | CGACACTTTC | 250 |
| PUMY010-2  | GGATCTCTCT  | ATTCCAAAGG     | AGGTGTTTTA | TCACACGACT  | CGACACTTTC | 250 |
| PUMY010-3  | GGATCTCTCT  | ATTCCAAAGG     | AGGTGTTTTA | TCACACGACT  | CGACACTTTC | 250 |
| PUMY010-4  | GGATCTCTCT  | ATTCCAAAGG     | AGGTGTTTTA | TCACACGACT  | CGACACTTTC | 250 |
| PUMY010-5  | GGATCTCTCT  | ATTCCAAAGG     | AGGTGTTTTA | TCACACGACT  | CGACACTTTC | 250 |
| PUMY010-6  | GGATCTCTCT  | ATTCCAAAGG     | AGGTGTTTTA | TCACACGACT  | CGACACTTTC | 250 |
| PUMY010-7  | GGATCTCTCT  | ATTCCAAAGG     | AGGTGTTTTA | TCACACGACT  | CGACACTTTC | 250 |
|            |             |                |            |             |            |     |
| PUMY010-1  | TAATTACTION | ACACAGTGGG     | GTTTACTTTA | CTACTATTCT  | TTTGTTCGTT | 300 |
| PUMY010-2  | TAATTACTION | ACACAGTGGG     | GTTTACTTTA | CTACTATTCT  | TTTGTTCGTT | 300 |
| PUMY010-3  | TAATTACTION | ACACAGTGGG     | GTTTACTTTA | CTACTATTCT  | TTTGTTCGTT | 300 |
| PUMY010-4  | TAATTACTION | ACACAGTGGG     | GTTTACTTTA | CTACTATTCT  | TTTGTTCGTT | 300 |
| PUMY010-5  | TAATTACTION | ACACAGTGGG     | GTTTACTTTA | CTACTATTCT  | TTTGTTCGTT | 300 |
| PUMY010-6  | TAATTACTION | ACACAGTGGG     | GTTTACTTTA | CTACTATTCT  | TTTGTTCGTT | 300 |
| PUMY010-7  | TAATTACTION | ACACAGTGGG     | GTTTACTTTA | CTACTATTCT  | TTTGTTCGTT | 300 |
|            |             |                |            |             |            |     |
| PUMY010-1  | GGGGGAAAGC  | TCTCTTTC-G     | GGGGGGGAGT | TCTCCCAGTG  | GATGCAAACA | 349 |
| PUMY010-2  | GGGGGAAAGC  | TCTCTTTC-G     | GGGGGGGAGT | TCTCCCAGTG  | GATGCAAACA | 349 |
| PUMY010-3  | GGGGGAAAGC  | TCTCTTTC-G     | GGGGGGGAGT | TCTCCCAGTG  | GATGCAAACA | 349 |
| PUMY010-4  | GGGGGAAAGC  | TCTCTTTCGG     | GGGGGGGAGT | TCTCCCAGTG  | GATGCAAACA | 350 |
| PUMY010-5  | GGGGGAAAGC  | TCTCTTTCGG     | GGGGGGGAGT | TCTCCCAGTG  | GATGCAAACA | 350 |
| PUMY010-6  | GGGGGAAAGC  | TCTCTTTC-G     | GGGGGGGAGT | TCTCCCAGTG  | GATGCAAACA | 349 |
| PUMY010-7  | GGGGGAAAGC  | TCTCTTTCGG     | GGGGGGGAGT | TCTCCCAGTG  | GATGCAAACA | 350 |
|            |             |                |            |             |            |     |
| PUMY010-1  | CAAACAAATA  | TTTTTTTAAA     | CTAATTCAGT | CAACACAAGA  | TTTCTTTTAG | 399 |
| PUMY010-2  | CAAACAAATA  | TTTTTTTAAA     | CTAATTCAGT | CAACACAAGA  | TTTCTTTTAG | 399 |
| PUMY010-3  | CAAACAAATA  | TTTTTTTAAA     | CTAATTCAGT | CAACACAAGA  | TTTCTTTTAG | 399 |
| PUMY010-4  | CAAACAAATA  | TTTTTTTAAA     | CTAATTCAGT | CAACACAAGA  | TTTCTTTTAG | 400 |
| PUMY010-5  | CAAACAAATA  | TTTTTTTAAA     | CTAATTCAGT | CAACACAAGA  | TTTCTTTTAG | 400 |
| PUMY010-6  | CAAACAAATA  | TTTTTTTAAA     | CTAATTCAGT | CAACACAAGA  | TTTCTTTTAG | 399 |
| PUMY010-7  | CAAACAAATA  | TTTTTTTAAA     | CTAATTCAGT | CAACACAAGA  | TTTCTTTTAG | 400 |
|            |             |                |            |             |            |     |
| 5.8S nrDNA |             |                |            |             |            |     |
| PUMY010-1  | TAGAAAACAA  | CTTCAAAACT     | TTCACAATG  | GATCTCTTGG  | TTCTCGCATC | 449 |
| PUMY010-2  | TAGAAAACAA  | CTTCAAAACT     | TTCACAATG  | GATCTCTTGG  | TTCTCGCATC | 449 |
| PUMY010-3  | TAGAAAACAA  | CTTCAAAACT     | TTCACAATG  | GATCTCTTGG  | TTCTCGCATC | 449 |
| PUMY010-4  | TAGAAAACAA  | CTTCAAAACT     | TTCACAATG  | GATCTCTTGG  | TTCTCGCATC | 450 |
| PUMY010-5  | TAGAAAACAA  | CTTCAAAACT     | TTCACAATG  | GATCTCTTGG  | TTCTCGCATC | 450 |
| PUMY010-6  | TAGAAAACAA  | CTTCAAAACT     | TTCACAATG  | GATCTCTTGG  | TTCTCGCATC | 449 |
| PUMY010-7  | TAGAAAACAA  | CTTCAAAACT     | TTCACAATG  | GATCTCTTGG  | TTCTCGCATC | 450 |
|            |             |                |            |             |            |     |
| PUMY010-1  | GATGAAGAAC  | GCAGCGAAAT     | GCGATACGTA | ATGTGAATTG  | CAGAATTCGG | 499 |
| PUMY010-2  | GATGAAGAAC  | GCAGCGAAAT     | GCGATACGTA | ATGTGAATTG  | CAGAATTCGG | 499 |
| PUMY010-3  | GATGAAGAAC  | GCAGCGAAAT     | GCGATACGTA | ATGTGAATTG  | CAGAATTCGG | 499 |
| PUMY010-4  | GATGAAGAAC  | GCAGCGAAAT     | GCGATACGTA | ATGTGAATTG  | CAGAATTCGG | 500 |
| PUMY010-5  | GATGAAGAAC  | GCAGCGAAAT     | GCGATACGTA | ATGTGAATTG  | CAGAATTCGG | 500 |
| PUMY010-6  | GATGAAGAAC  | GCAGCGAAAT     | GCGATACGTA | ATGTGAATTG  | CAGAATTCGG | 499 |
| PUMY010-7  | GATGAAGAAC  | GCAGCGAAAT     | GCGATACGTA | ATGTGAATTG  | CAGAATTCGG | 500 |
|            |             |                |            |             |            |     |
| PUMY010-1  | TGAATCATCG  | AATCTTTGAA     | CGCACATTGC | GCCTCTGGT   | ATTCGGGGG  | 549 |
| PUMY010-2  | TGAATCATCG  | AATCTTTGAA     | CGCACATTGC | GCCTCTGGT   | ATTCGGGGG  | 549 |
| PUMY010-3  | TGAATCATCG  | AATCTTTGAA     | CGCACATTGC | GCCTCTGGT   | ATTCGGGGG  | 549 |
| PUMY010-4  | TGAATCATCG  | AATCTTTGAA     | CGCACATTGC | GCCTCTGGT   | ATTCGGGGG  | 550 |
| PUMY010-5  | TGAATCATCG  | AATCTTTGAA     | CGCACATTGC | GCCTCTGGT   | ATTCGGGGG  | 550 |
| PUMY010-6  | TGAATCATCG  | AATCTTTGAA     | CGCACATTGC | GCCTCTGGT   | ATTCGGGGG  | 549 |
| PUMY010-7  | TGAATCATCG  | AATCTTTGAA     | CGCACATTGC | GCCTCTGGT   | ATTCGGGGG  | 550 |

Figure S2. Cont.

|           | ITS2       |            |            |            |            |     |
|-----------|------------|------------|------------|------------|------------|-----|
| PUMY010-1 | GCATGCCTGT | TTGAGCGTCA | TTTCCTTCTC | AAACACATTG | TGTTTGGTAG | 599 |
| PUMY010-2 | GCATGCCTGT | TTGAGCGTCA | TTTCCTTCTC | AAACACATTG | TGTTTGGTAG | 599 |
| PUMY010-3 | GCATGCCTGT | TTGAGCGTCA | TTTCCTTCTC | AAACACGTTG | TGTTTGGTAG | 599 |
| PUMY010-4 | GCATGCCTGT | TTGAGCGTCA | TTTCCTTCTC | AAACACGTTG | TGTTTGGTAG | 600 |
| PUMY010-5 | GCATGCCTGT | TTGAGCGTCA | TTTCCTTCTC | AAACACATTG | TGTTTGGTAG | 600 |
| PUMY010-6 | GCATGCCTGT | TTGAGCGTCA | TTTCCTTCTC | AAACACGTTG | TGTTTGGTAG | 599 |
| PUMY010-7 | GCATGCCTGT | TTGAGCGTCA | TTTCCTTCTC | AAACACATTG | TGTTTGGTAG | 600 |
| •         |            |            |            |            |            |     |
| PUMY010-1 | TGAGTGATAC | TCTCGTTTTT | GAGTTAACTT | GAAATTGTAG | GCCATATCAG | 649 |
| PUMY010-2 | TGAGTGATAC | TCTCGTTTTT | GAGTTAACTT | GAAATTGTAG | GCCATATCAG | 649 |
| PUMY010-3 | TGAGTGATAC | TCTCGTTTTT | GAGTTAACTT | GAAATTGTAG | GCCATATCAG | 649 |
| PUMY010-4 | TGAGTGATAC | TCTCGTTTTT | GAGTTAACTT | GAAATTGTAG | GCCATATCAG | 650 |
| PUMY010-5 | TGAGTGATAC | TCTCGTTTTT | GAGTTAACTT | GAAATTGTAG | GCCATATCAG | 650 |
| PUMY010-6 | TGAGTGATAC | TCTCGTTTTT | GAGTTAACTT | GAAATTGTAG | GCCATATCAG | 649 |
| PUMY010-7 | TGAGTGATAC | TCTCGTTTTT | GAGTTAACTT | GAAATTGTAG | GCCATATCAG | 650 |
| •         |            |            |            |            |            |     |
| PUMY010-1 | TATGTGGGAC | ACGAGCGCAA | GCTTCTCTAT | TAATCTGCTG | CTCGTTTGCG | 699 |
| PUMY010-2 | TATGTGGGAC | ACGAGCGCAA | GCTTCTCTAT | TAATCTGCTG | CTCGTTTGCG | 699 |
| PUMY010-3 | TATGTGGGAC | ACGAGCGCAA | GCTTCTCTAT | TAATCTGCTG | CTCGTTTGCG | 699 |
| PUMY010-4 | TATGTGGGAC | ACGAGCGCAA | GCTTCTCTAT | TAATCTGCTG | CTCGTTTGCG | 700 |
| PUMY010-5 | TATGTGGGAC | ACGAGCGCAA | GCTTCTCTAT | TAATCTGCTG | CTCGTTTGCG | 700 |
| PUMY010-6 | TATGTGGGAC | ACGAGCGCAA | GCTTCTCTAT | TAATCTGCTG | CTCGTTTGCG | 699 |
| PUMY010-7 | TATGTGGGAC | ACGAGCGCAA | GCTTCTCTAT | TAATCTGCTG | CTCGTTTGCG | 700 |
| •         |            |            |            |            |            |     |
| PUMY010-1 | CGAGCGGCGG | GGGTTAATAC | TGTATTAGGT | TTTACCAACT | CGGTGTTGAT | 749 |
| PUMY010-2 | CGAGCGGCGG | GGGTTAATAC | TGTATTAGGT | TTTACCAACT | CGGTGTTGAT | 749 |
| PUMY010-3 | CGAGCGGCGG | GGGTTAATAC | TGTATTAGGT | TTTACCAACT | CGGTGTTGAT | 749 |
| PUMY010-4 | CGAGCGGCGG | GGGTTAATAC | TGTATTAGGT | TTTACCAACT | CGGTGTTGAT | 750 |
| PUMY010-5 | CGAGCGGCGG | GGGTTAATAC | TGTATTAGGT | TTTACCAACT | CGGTGTTGAT | 750 |
| PUMY010-6 | CGAGCGGCGG | GGGTTAATAC | TGTATTAGGT | TTTACCAACT | CGGTGTTGAT | 749 |
| PUMY010-7 | CGAGCGGCGG | GGGTTAATAC | TGTATTAGGT | TTTACCAACT | CGGTGTTGAT | 750 |
| •         |            |            |            |            |            |     |
| PUMY010-1 | CTAGGGAGGG | ATAAGTGAGT | GTTCTGTGCG | TGCTGGGCAG | ACAGACGTCT | 799 |
| PUMY010-2 | CTAGGGAGGG | ATAAGTGAGT | GTTTTGTGCG | TGCTGGGCAG | ACAGACGTCT | 799 |
| PUMY010-3 | CTAGGGAGGG | ATAAGTGAGT | GTTCTGTGCG | TGCTGGGCAG | ACAGACGTCT | 799 |
| PUMY010-4 | CTAGGGAGGG | ATAAGTGAGT | GTTCTGTGCG | TGCTGGGCAG | ACAGACGTCT | 800 |
| PUMY010-5 | CTAGGGAGGG | ATAAGTGAGT | GTTCTGTGCG | TGCTGGGCAG | ACAGACGTCT | 800 |
| PUMY010-6 | CTAGGGAGGG | ATAAGTGAGT | GTTTTGTGCG | TGCTGGGCAG | ACAGACGTCT | 799 |
| PUMY010-7 | CTAGGGAGGG | ATAAGTGAGT | GTTTTGTGCG | TGCTGGGCAG | ACAGACGTCT | 800 |
| 25S nrDNA |            |            |            |            |            |     |
| PUMY010-1 | TTAAGTTTGA | CCTCAAATCA | GGTAGGGTTA | CCCGCTGAAC | TTAA       | 843 |
| PUMY010-2 | TTAAGTTTGA | CCTCAAATCA | GGTAGGGTTA | CCCGCTGAAC | TTAA       | 843 |
| PUMY010-3 | TTAAGTTTGA | CCTCAAATCA | GGTAGGGTTA | CCCGCTGAAC | TTAA       | 843 |
| PUMY010-4 | TTAAGTTTGA | CCTCAAATCA | GGTAGGGTTA | CCCGCTGAAC | TTAA       | 844 |
| PUMY010-5 | TTAAGTTTGA | CCTCAAATCA | GGTAGGGTTA | CCCGCTGAAC | TTAA       | 844 |
| PUMY010-6 | TTAAGTTTGA | CCTCAAATCA | GGTAGGGTTA | CCCGCTGAAC | TTAA       | 843 |
| PUMY010-7 | TTAAGTTTGA | CCTCAAATCA | GGTAGGGTTA | CCCGCTGAAC | TTAA       | 844 |

Figure S2. Cont.

|            |            | 18S nrDNA   | ITS1       |             |            |  |     |
|------------|------------|-------------|------------|-------------|------------|--|-----|
| PUMY011-1  | AAGGATCATT | AAAGAAATTT  | AATTGATTTG | TCTGAGCTCG  | GAGAGAGACA |  | 50  |
| PUMY011-2  | AAGGATCATT | AAAGAAATTT  | AATTGATTTG | TCTGAGCTCG  | GAGAGAGACA |  | 50  |
| PUMY011-3  | AAGGATCATT | AAAGAAATTT  | AATTGATTTG | TCTGAGCTCG  | GAGAGAGACA |  | 50  |
| ●          |            |             |            |             |            |  |     |
| PUMY011-1  | TCTCTGGGGA | GGACCAAGTGT | AGACACTCAG | GAGGCACCTA  | AAATATTTTC |  | 100 |
| PUMY011-2  | TCTCTGGGGA | GGACCAAGTGT | AGACACTCAG | GAGGCCTCCTA | AAATATTTTC |  | 100 |
| PUMY011-3  | TCTCTGGGGA | GGACCAAGTGT | AGACACTCAG | GAGGCACCTA  | AAATATTTTC |  | 100 |
| PUMY011-1  | TCTGCTGTGA | ATGCTATTTTC | TCCTGCCTGC | GCTTAAGTGC  | GCGGTTGGTG |  | 150 |
| PUMY011-2  | TCTGCTGTGA | ATGCTATTTTC | TCCTGCCTGC | GCTTAAGTGC  | GCGGTTGGTG |  | 150 |
| PUMY011-3  | TCTGCTGTGA | ATGCTATTTTC | TCCTGCCTGC | GCTTAAGTGC  | GCGGTTGGTG |  | 150 |
| PUMY011-1  | GGTGTCTGCG | AGTGGGGGGA  | GGGAGCCGAC | AAAGACCTGG  | GAGTGTGCGT |  | 200 |
| PUMY011-2  | GGTGTCTGCG | AGTGGGGGGA  | GGGAGCCGAC | AAAGACCTGG  | GAGTGTGCGT |  | 200 |
| PUMY011-3  | GGTGTCTGCG | AGTGGGGGGA  | GGGAGCCGAC | AAAGACCTGG  | GAGTGTGCGT |  | 200 |
| PUMY011-1  | GGATCTCTCT | ATTCCAAAGG  | AGGTGTTTTA | TCACACGACT  | CGACACTTTC |  | 250 |
| PUMY011-2  | GGATCTCTCT | ATTCCAAAGG  | AGGTGTTTTA | TCACACGACT  | CGACACTTTC |  | 250 |
| PUMY011-3  | GGATCTCTCT | ATTCCAAAGG  | AGGTGTTTTA | TCACACGACT  | CGACACTTTC |  | 250 |
| PUMY011-1  | TAATTACTAC | ACACAGTGGG  | GTTTACTTTA | CTACTATTCT  | TTTGTTCGTT |  | 300 |
| PUMY011-2  | TAATTACTAC | ACACAGTGGG  | GTTTACTTTA | CTACTATTCT  | TTTGTTCGTT |  | 300 |
| PUMY011-3  | TAATTACTAC | ACACAGTGGG  | GTTTACTTTA | CTACTATTCT  | TTTGTTCGTT |  | 300 |
| PUMY011-1  | GGGGGAAAGC | TCTCTTTCGG  | GAGGGAGTTC | TCCCAGTGGA  | TGCAAACACA |  | 350 |
| PUMY011-2  | GGGGGAAAGC | TCTCTTTCGG  | GAGGGAGTTC | TCCCAGTGGA  | TGCAAACACA |  | 350 |
| PUMY011-3  | GGGGGAAAGC | TCTCTTTCGG  | GAGGGAGTTC | TCCCAGTGGA  | TGCAAACACA |  | 350 |
| ●●●●●      |            |             |            |             |            |  |     |
| PUMY011-1  | AACAAATATT | TTTTTATTTT  | AACTAATTCA | GTCAACACAA  | GATTTCTTTT |  | 400 |
| PUMY011-2  | AACAAATATT | TTTTTA----  | AAATAATTCA | GTCAACACAA  | GATTTCTTTT |  | 396 |
| PUMY011-3  | AACAAATATT | TTTTTA----  | AAATAATTCA | GTCAACACAA  | GATTTCTTTT |  | 396 |
| 5.8S nrDNA |            |             |            |             |            |  |     |
| PUMY011-1  | AGTAGAAAAC | AACTTCAAAA  | CTTTCAACAA | TGGATCTCTT  | GGTTCCTGCA |  | 450 |
| PUMY011-2  | AGTAGAAAAC | AACTTCAAAA  | CTTTCAACAA | TGGATCTCTT  | GGTTCCTGCA |  | 446 |
| PUMY011-3  | AGTAGAAAAC | AACTTCAAAA  | CTTTCAACAA | TGGATCTCTT  | GGTTCCTGCA |  | 446 |
| PUMY011-1  | TCGATGAAGA | ACGCAGCGAA  | ATGCGATACG | TAATGTGAAT  | TGCAGAATTC |  | 500 |
| PUMY011-2  | TCGATGAAGA | ACGCAGCGAA  | ATGCGATACG | TAATGTGAAT  | TGCAGAATTC |  | 496 |
| PUMY011-3  | TCGATGAAGA | ACGCAGCGAA  | ATGCGATACG | TAATGTGAAT  | TGCAGAATTC |  | 496 |
| PUMY011-1  | CGTGAATCAT | CGAATCTTTG  | AACGCACATT | GCGCCCTCTG  | GTATTCGGGG |  | 550 |
| PUMY011-2  | CGTGAATCAT | CGAATCTTTG  | AACGCACATT | GCGCCCTCTG  | GTATTCGGGG |  | 546 |
| PUMY011-3  | CGTGAATCAT | CGAATCTTTG  | AACGCACATT | GCGCCCTCTG  | GTATTCGGGG |  | 546 |
| ITS2       |            |             |            |             |            |  |     |
| PUMY011-1  | GGGCATGCCT | GTTTGAGCGT  | CATTTCTTTC | TCAAACACGT  | TGTGTTTGGT |  | 600 |
| PUMY011-2  | GGGCATGCCT | GTTTGAGCGT  | CATTTCTTTC | TCAAACACGT  | TGTGTTTGGT |  | 596 |
| PUMY011-3  | GGGCATGCCT | GTTTGAGCGT  | CATTTCTTTC | TCAAACACGT  | TGTGTTTGGT |  | 596 |
| PUMY011-1  | AGTGAGTGAT | ACTCTCGTTT  | TTGAGTTAAC | TTGAAATTGT  | AGGCCATATC |  | 650 |
| PUMY011-2  | AGTGAGTGAT | ACTCTCGTTT  | TTGAGTTAAC | TTGAAATTGT  | AGGCCATATC |  | 646 |
| PUMY011-3  | AGTGAGTGAT | ACTCTCGTTT  | TTGAGTTAAC | TTGAAATTGT  | AGGCCATATC |  | 646 |
| PUMY011-1  | AGTATGTGGG | ACACGAGCGC  | AAGCTTCTCT | ATTAATCTGC  | TGCTCGTTTG |  | 700 |
| PUMY011-2  | AGTATGTGGG | ACACGAGCGC  | AAGCTTCTCT | ATTAATCTGC  | TGCTCGTTTG |  | 696 |
| PUMY011-3  | AGTATGTGGG | ACACGAGCGC  | AAGCTTCTCT | ATTAATCTGC  | TGCTCGTTTG |  | 696 |
| PUMY011-1  | CGCGAGCGGC | GGGGTTAAT   | ACTGTATTAG | GTTTTACCAA  | CTCGGTGTTG |  | 750 |
| PUMY011-2  | CGCGAGCGGC | GGGGTTAAT   | ACTGTATTAG | GTTTTACCAA  | CTCGGTGTTG |  | 746 |
| PUMY011-3  | CGCGAGCGGC | GGGGTTAAT   | ACTGTATTAG | GTTTTACCAA  | CTCGGTGTTG |  | 746 |
| PUMY011-1  | ATCTAGGGAG | GGATAAGTGA  | GTGTTTTGTG | CGTGCTGGGC  | AGACAGACGT |  | 800 |
| PUMY011-2  | ATCTAGGGAG | GGATAAGTGA  | GTGTTTTGTG | CGTGCTGGGC  | AGACAGACGT |  | 796 |
| PUMY011-3  | ATCTAGGGAG | GGATAAGTGA  | GTGTTTTGTG | CGTGCTGGGC  | AGACAGACGT |  | 796 |
| 5.8S nrDNA |            |             |            |             |            |  |     |
| PUMY011-1  | CTTTAAGTTT | GACCTCAAAT  | CAGGTAGGGT | TACCCGCTGA  | ACTTAA     |  | 846 |
| PUMY011-2  | CTTTAAGTTT | GACCTCAAAT  | CAGGTAGGGT | TACCCGCTGA  | ACTTAA     |  | 842 |
| PUMY011-3  | CTTTAAGTTT | GACCTCAAAT  | CAGGTAGGGT | TACCCGCTGA  | ACTTAA     |  | 842 |

Figure S2. Cont.

|           |             |            |            |            |            |     |
|-----------|-------------|------------|------------|------------|------------|-----|
|           | 18S nrDNA   | ITS1       |            |            |            |     |
| PUMY020-1 | AAGGATCATT  | ACTGTGATTT | AAACTTCTTT | CTTACACCGC | GTGAGCGCAC | 50  |
| PUMY020-2 | AAGGATCATT  | ACTGTGATTT | AAACTTCTTT | CTTACACCGC | GTGAGCGCAC | 50  |
| PUMY020-3 | AAGGATCATT  | ACTGTGATTT | AAACTTCTTT | CTTACACCGC | GTGAGCGCAC | 50  |
| PUMY020-4 | AAGGATCATT  | ACTGTGATTT | AAACTTCTTT | CTTACACCGC | GTGAGCGCAC | 50  |
| PUMY020-1 | AACAACACCT  | AAACACGAAT | AACCATGTCA | CCCAGAGAAA | ATCTCAAACG | 100 |
| PUMY020-2 | AACAACACCT  | AAACACGAAT | AACCATGTCA | CCCAGAGAAA | ATCTCAAACG | 100 |
| PUMY020-3 | AACAACACCT  | AAACACGAAT | AACCATGTCA | CCCAGAGAAA | ATCTCAAACG | 100 |
| PUMY020-4 | AACAACACCT  | AAACACGAAT | AACCATGTCA | CCCAGAGAAA | ATCTCAAACG | 100 |
|           | •           | •          | 5.8S nrDNA |            |            |     |
| PUMY020-1 | AGAAGAAA-A  | AGAAAAATAA | AACTTTCAAC | AACGGATCTC | TTGGTTCTCG | 149 |
| PUMY020-2 | AGAAGAAA-A  | AGAAAAATAA | AACTTTCAAC | AACGGATCTC | TTGGTTCTCG | 149 |
| PUMY020-3 | AGAAGAAAAGA | AAAAAAATAA | AACTTTCAAC | AACGGATCTC | TTGGTTCTCG | 150 |
| PUMY020-4 | AGAAGAAAAGA | AAAAAAATAA | AACTTTCAAC | AACGGATCTC | TTGGTTCTCG | 150 |
| PUMY020-1 | CATCGATGAA  | GAGCGCAGCG | AAATGCGATA | CCTAGTGTGA | ATTGCAGCCA | 199 |
| PUMY020-2 | CATCGATGAA  | GAGCGCAGCG | AAATGCGATA | CCTAGTGTGA | ATTGCAGCCA | 199 |
| PUMY020-3 | CATCGATGAA  | GAGCGCAGCG | AAATGCGATA | CCTAGTGTGA | ATTGCAGCCA | 200 |
| PUMY020-4 | CATCGATGAA  | GAGCGCAGCG | AAATGCGATA | CCTAGTGTGA | ATTGCAGCCA | 200 |
| PUMY020-1 | TCGTGAATCA  | TCGAGTTCTT | GAACGCACAT | TGCGCCCTCC | GGCATTCCGG | 249 |
| PUMY020-2 | TCGTGAATCA  | TCGAGTTCTT | GAACGCACAT | TGCGCCCTCC | GGCATTCCGG | 249 |
| PUMY020-3 | TCGTGAATCA  | TCGAGTTCTT | GAACGCACAT | TGCGCCCTCC | GGCATTCCGG | 250 |
| PUMY020-4 | TCGTGAATCA  | TCGAGTTCTT | GAACGCACAT | TGCGCCCTCC | GGCATTCCGG | 250 |
|           |             |            | ITS2       |            |            |     |
| PUMY020-1 | GGGGCATGCC  | TGTTTGAGCG | TCGTTTCCTT | CTTGCGCAAG | CAGAGTTGGG | 299 |
| PUMY020-2 | GGGGCATGCC  | TGTTTGAGCG | TCGTTTCCTT | CTTGCGCAAG | CAGAGTTGGG | 299 |
| PUMY020-3 | GGGGCATGCC  | TGTTTGAGCG | TCGTTTCCTT | CTTGCGCAAG | CAGAGTTGGG | 300 |
| PUMY020-4 | GGGGCATGCC  | TGTTTGAGCG | TCGTTTCCTT | CTTGCGCAAG | CAGAGTTGGG | 300 |
| PUMY020-1 | GTTGCCACGG  | CCCGTGCGGC | CTGTGTGTGG | CTCCCCGAA  | ACGGAACGGC | 349 |
| PUMY020-2 | GTTGCCACGG  | CCCGTGCGGC | CTGTGTGTGG | CTCCCCGAA  | ACGGAACGGC | 349 |
| PUMY020-3 | GTTGCCACGG  | CCCGTGCGGC | CTGTGTGTGG | CTCCCCGAA  | ACGGAACGGC | 350 |
| PUMY020-4 | GTTGCCACGG  | CCCGTGCGGC | CTGTGTGTGG | CTCCCCGAA  | ACGGAACGGC | 350 |
| PUMY020-1 | AGCGGGACTG  | AGCGAAGTAC | ACAACACTCG | CGCTTGGCCC | GCCGAACTTT | 399 |
| PUMY020-2 | AGCGGGACTG  | AGCGAAGTAC | ACAACACTCG | CGCTTGGCCC | GCCGAACTTT | 399 |
| PUMY020-3 | AGCGGGACTG  | AGCGAAGTAC | ACAACACTCG | CGCTTGGCCC | GCCGAACTTT | 400 |
| PUMY020-4 | AGCGGGACTG  | AGCGAAGTAC | ACAACACTCG | CGCTTGGCCC | GCCGAACTTT | 400 |
|           | •           | 25S nrDNA  |            |            |            |     |
| PUMY020-1 | TTTTTTAAAT  | CTAAGCTCGA | CCTCAAATCA | GGTAGGAATA | CCCGCTGAAC | 449 |
| PUMY020-2 | TTTTTT -AAT | CTAAGCTCGA | CCTCAAATCA | GGTAGGAATA | CCCGCTGAAC | 448 |
| PUMY020-3 | TTTTTTAAAT  | CTAAGCTCGA | CCTCAAATCA | GGTAGGAATA | CCCGCTGAAC | 450 |
| PUMY020-4 | TTTTTT -AAT | CTAAGCTCGA | CCTCAAATCA | GGTAGGAATA | CCCGCTGAAC | 449 |
| PUMY020-1 | TTAA        |            |            |            |            | 453 |
| PUMY020-2 | TTAA        |            |            |            |            | 452 |
| PUMY020-3 | TTAA        |            |            |            |            | 454 |
| PUMY020-4 | TTAA        |            |            |            |            | 453 |

Figure S2. Cont.

|           |             |            |            |            |            |  |     |
|-----------|-------------|------------|------------|------------|------------|--|-----|
|           | 18S nrDNA   | ITS1       |            |            |            |  |     |
| PUMY021-1 | AAGGATCATT  | ACTGTGATTT | AAACTTCTTT | CTTACACCGC | GTGAGCGCAC |  | 50  |
| PUMY021-2 | AAGGATCATT  | ACTGTGATTT | AAACTTCTTT | CTTACACCGC | GTGAGCGCAC |  | 50  |
| PUMY021-3 | AAGGATCATT  | ACTGTGATTT | AAACTTCTTT | CTTACACCGC | GTGAGCGCAC |  | 50  |
| PUMY021-4 | AAGGATCATT  | ACTGTGATTT | AAACTTCTTT | CTTACACCGC | GTGAGCGCAC |  | 50  |
| PUMY021-5 | AAGGATCATT  | ACTGTGATTT | AAACTTCTTT | CTTACACCGC | GTGAGCGCAC |  | 50  |
| PUMY021-1 | AACAACACCT  | AAACACGAAT | AACCATGTCA | CCCAGAGAAA | ATCTCAAACG |  | 100 |
| PUMY021-2 | AACAACACCT  | AAACACGAAT | AACCATGTCA | CCCAGAGAAA | ATCTCAAACG |  | 100 |
| PUMY021-3 | AACAACACCT  | AAACACGAAT | AACCATGTCA | CCCAGAGAAA | ATCTCAAACG |  | 100 |
| PUMY021-4 | AACAACACCT  | AAACACGAAT | AACCATGTCA | CCCAGAGAAA | ATCTCAAACG |  | 100 |
| PUMY021-5 | AACAACACCT  | AAACACGAAT | AACCATGTCA | CCCAGAGAAA | ATCTCAAACG |  | 100 |
|           | •           | •          | 5.8S nrDNA |            |            |  |     |
| PUMY021-1 | AGAAGAAA-A  | AGAAAAATAA | AACTTTCAAC | AACGGATCTC | TTGGTTCTCG |  | 149 |
| PUMY021-2 | AGAAGAAA-A  | AGAAAAATAA | AACTTTCAAC | AACGGATCTC | TTGGTTCTCG |  | 149 |
| PUMY021-3 | AGAAGAAAAGA | AAAAAAATAA | AACTTTCAAC | AACGGATCTC | TTGGTTCTCG |  | 150 |
| PUMY021-4 | AGAAGAAAAGA | AAAAAAATAA | AACTTTCAAC | AACGGATCTC | TTGGTTCTCG |  | 150 |
| PUMY021-5 | AGAAGAAAAGA | AAAAAAATAA | AACTTTCAAC | AACGGATCTC | TTGGTTCTCG |  | 150 |
| PUMY021-1 | CATCGATGAA  | GAGCGCAGCG | AAATGCGATA | CCTAGTGTGA | ATTGCAGCCA |  | 199 |
| PUMY021-2 | CATCGATGAA  | GAGCGCAGCG | AAATGCGATA | CCTAGTGTGA | ATTGCAGCCA |  | 199 |
| PUMY021-3 | CATCGATGAA  | GAGCGCAGCG | AAATGCGATA | CCTAGTGTGA | ATTGCAGCCA |  | 200 |
| PUMY021-4 | CATCGATGAA  | GAGCGCAGCG | AAATGCGATA | CCTAGTGTGA | ATTGCAGCCA |  | 200 |
| PUMY021-5 | CATCGATGAA  | GAGCGCAGCG | AAATGCGATA | CCTAGTGTGA | ATTGCAGCCA |  | 200 |
| PUMY021-1 | TCGTGAATCA  | TCGAGTTCTT | GAACGCACAT | TGCGCCCTCC | GGCATTCCGG |  | 249 |
| PUMY021-2 | TCGTGAATCA  | TCGAGTTCTT | GAACGCACAT | TGCGCCCTCC | GGCATTCCGG |  | 249 |
| PUMY021-3 | TCGTGAATCA  | TCGAGTTCTT | GAACGCACAT | TGCGCCCTCC | GGCATTCCGG |  | 250 |
| PUMY021-4 | TCGTGAATCA  | TCGAGTTCTT | GAACGCACAT | TGCGCCCTCC | GGCATTCCGG |  | 250 |
| PUMY021-5 | TCGTGAATCA  | TCGAGTTCTT | GAACGCACAT | TGCGCCCTCC | GGCATTCCGG |  | 250 |
|           |             |            | ITS2       |            |            |  |     |
| PUMY021-1 | GGGGCATGCC  | TGTTTGAGCG | TCGTTTCCTT | CTTGCGCAAG | CAGAGTTGGG |  | 299 |
| PUMY021-2 | GGGGCATGCC  | TGTTTGAGCG | TCGTTTCCTT | CTTGCGCAAG | CAGAGTTGGG |  | 299 |
| PUMY021-3 | GGGGCATGCC  | TGTTTGAGCG | TCGTTTCCTT | CTTGCGCAAG | CAGAGTTGGG |  | 300 |
| PUMY021-4 | GGGGCATGCC  | TGTTTGAGCG | TCGTTTCCTT | CTTGCGCAAG | CAGAGTTGGG |  | 300 |
| PUMY021-5 | GGGGCATGCC  | TGTTTGAGCG | TCGTTTCCTT | CTTGCGCAAG | CAGAGTTGGG |  | 300 |
| PUMY021-1 | GTTGCCACGG  | CCCGTGCGGC | CTGTGTGTGG | CTCCCCGAA  | ACGGAACGGC |  | 349 |
| PUMY021-2 | GTTGCCACGG  | CCCGTGCGGC | CTGTGTGTGG | CTCCCCGAA  | ACGGAACGGC |  | 349 |
| PUMY021-3 | GTTGCCACGG  | CCCGTGCGGC | CTGTGTGTGG | CTCCCCGAA  | ACGGAACGGC |  | 350 |
| PUMY021-4 | GTTGCCACGG  | CCCGTGCGGC | CTGTGTGTGG | CTCCCCGAA  | ACGGAACGGC |  | 350 |
| PUMY021-5 | GTTGCCACGG  | CCCGTGCGGC | CTGTGTGTGG | CTCCCCGAA  | ACGGAACGGC |  | 350 |
| PUMY021-1 | AGCGGGACTG  | AGCGAAGTAC | ACAACACTCG | CGCTTGGCCC | GCCGAACTTT |  | 399 |
| PUMY021-2 | AGCGGGACTG  | AGCGAAGTAC | ACAACACTCG | CGCTTGGCCC | GCCGAACTTT |  | 399 |
| PUMY021-3 | AGCGGGACTG  | AGCGAAGTAC | ACAACACTCG | CGCTTGGCCC | GCCGAACTTT |  | 400 |
| PUMY021-4 | AGCGGGACTG  | AGCGAAGTAC | ACAACACTCG | CGCTTGGCCC | GCCGAACTTT |  | 400 |
| PUMY021-5 | AGCGGGACTG  | AGCGAAGTAC | ACAACACTCG | CGCTTGGCCC | GCCGAACTTT |  | 400 |
|           | •           |            | 25S nrDNA  |            |            |  |     |
| PUMY021-1 | TTTTTTTAAAT | CTAAGCTCGA | CCTCAAATCA | GGTAGGAATA | CCCGCTGAAC |  | 449 |
| PUMY021-2 | TTTTTTT-AAT | CTAAGCTCGA | CCTCAAATCA | GGTAGGAATA | CCCGCTGAAC |  | 448 |
| PUMY021-3 | TTTTTTTAAAT | CTAAGCTCGA | CCTCAAATCA | GGTAGGAATA | CCCGCTGAAC |  | 450 |
| PUMY021-4 | TTTTTTT-AAT | CTAAGCTCGA | CCTCAAATCA | GGTAGGAATA | CCCGCTGAAC |  | 449 |
| PUMY021-5 | TTTTTTTAAAT | CTAAGCTCGA | CCTCAAATCA | GGTAGGAATA | CCCGCTGAAC |  | 450 |
| PUMY021-1 | TTAA        |            |            |            |            |  | 453 |
| PUMY021-2 | TTAA        |            |            |            |            |  | 452 |
| PUMY021-3 | TTAA        |            |            |            |            |  | 454 |
| PUMY021-4 | TTAA        |            |            |            |            |  | 453 |
| PUMY021-5 | TTAA        |            |            |            |            |  | 454 |

Figure S2. Cont.



|           | 18S nrDNA   | ITS1       |              |            |            |     |
|-----------|-------------|------------|--------------|------------|------------|-----|
| PUMY040-1 | AAGGATCATT  | ACTGATTTGC | TTAATTGCAC   | CACATGTGTT | TTTTATTGAA | 50  |
| PUMY040-2 | AAGGATCATT  | ACTGATTTGC | TTAATTGCAC   | CACATGTGTT | TTTTATTGAA | 50  |
| PUMY040-3 | AAGGATCATT  | ACTGATTTGC | TTAATTGCAC   | CACATGTGTT | TTTTATTGAA | 50  |
| PUMY040-1 | CAAATTTCTT  | TGGTGGCGGG | AGCAATCCTA   | CCGCCAGAGG | TTATAACTAA | 100 |
| PUMY040-2 | CAAATTTCTT  | TGGTGGCGGG | AGCAATCCTA   | CCGCCAGAGG | TTATAACTAA | 100 |
| PUMY040-3 | CAAATTTCTT  | TGGTGGCGGG | AGCAATCCTA   | CCGCCAGAGG | TTATAACTAA | 100 |
| PUMY040-1 | ACCAAAC TTT | TTATTTACAG | TCAAAC TTTGA | TTTATTATTA | CAATAGTCAA | 150 |
| PUMY040-2 | ACCAAAC TTT | TTATTTACAG | TCAAAC TTTGA | TTTATTATTA | CAATAGTCAA | 150 |
| PUMY040-3 | ACCAAAC TTT | TTATTTACAG | TCAAAC TTTGA | TTTATTATTA | CAATAGTCAA | 150 |
|           | 5.8S nrDNA  |            |              |            |            |     |
| PUMY040-1 | AAC TTTCAAC | AACGGATCTC | TTGGTTCTCG   | CATCGATGAA | GAACGCAGCG | 200 |
| PUMY040-2 | AAC TTTCAAC | AACGGATCTC | TTGGTTCTCG   | CATCGATGAA | GAACGCAGCG | 200 |
| PUMY040-3 | AAC TTTCAAC | AACGGATCTC | TTGGTTCTCG   | CATCGATGAA | GAACGCAGCG | 200 |
| PUMY040-1 | AAATGCGATA  | CGTAATATGA | ATTGCAGATA   | TTCGTGAATC | ATCGAATCTT | 250 |
| PUMY040-2 | AAATGCGATA  | CGTAATATGA | ATTGCAGATA   | TTCGTGAATC | ATCGAATCTT | 250 |
| PUMY040-3 | AAATGCGATA  | CGTAATATGA | ATTGCAGATA   | TTCGTGAATC | ATCGAATCTT | 250 |
| PUMY040-1 | TGAACGCACA  | TTGCGCCCTT | TGGTATTCCA   | AAGGGCATGC | CTGTTTGAGC | 300 |
| PUMY040-2 | TGAACGCACA  | TTGCGCCCTT | TGGTATTCCA   | AAGGGCATGC | CTGTTTGAGC | 300 |
| PUMY040-3 | TGAACGCACA  | TTGCGCCCTT | TGGTATTCCA   | AAGGGCATGC | CTGTTTGAGC | 300 |
|           | ITS2        |            |              |            |            |     |
| PUMY040-1 | GTCATTTCTC  | CCTCAAACCC | CCGGGTTTGG   | TGTTGAGCAA | TACGCTAGGT | 350 |
| PUMY040-2 | GTCATTTCTC  | CCTCAAACCC | CCGGGTTTGG   | TGTTGAGCAA | TACGCTAGGT | 350 |
| PUMY040-3 | GTCATTTCTC  | CCTCAAACCC | CCGGGTTTGG   | TGTTGAGCAA | TACGCTAGGT | 350 |
|           | ●           |            |              |            |            |     |
| PUMY040-1 | TTGTTTGAAA  | GAATTT-ACG | TGGAACTTA    | TTTTAAGCGA | CTTAGGTTTA | 399 |
| PUMY040-2 | TTGTTTGAAA  | GAATTT-ACG | TGGAACTTA    | TTTTAAGCGA | CTTAGGTTTA | 399 |
| PUMY040-3 | TTGTTTGAAA  | GAATTTAACG | TGGAACTTA    | TTTTAAGCGA | CTTAGGTTTA | 400 |
|           | ●           |            |              |            |            |     |
|           | 25S nrDNA   |            |              |            |            |     |
| PUMY040-1 | TCCAAAAACG  | CTTATTTTGC | TAGTGGCCAC   | CACAATTTAT | TTCATAACTT | 449 |
| PUMY040-2 | TCC-AAAACG  | CTTATTTTGC | TAGTGGCCAC   | CACAATTTAT | TTCATAACTT | 448 |
| PUMY040-3 | TCCAAAAACG  | CTTATTTTGC | TAGTGGCCAC   | CACAATTTAT | TTCATAACTT | 450 |
| PUMY040-1 | TGACCTCAAA  | TCAGGTAGGA | CTACCCGCTG   | AACTTAA    |            | 486 |
| PUMY040-2 | TGACCTCAAA  | TCAGGTAGGA | CTACCCGCTG   | AACTTAA    |            | 485 |
| PUMY040-3 | TGACCTCAAA  | TCAGGTAGGA | CTACCCGCTG   | AACTTAA    |            | 487 |

Figure S2. Cont.

|           | 18S nrDNA   | ITS1       |             |            |             |     |
|-----------|-------------|------------|-------------|------------|-------------|-----|
| PUMY065-1 | AAGGATCATT  | AAAGAAATTT | AATAATTTTG  | AAAATGGATT | TTTTTTGTTT  | 50  |
| PUMY065-2 | AAGGATCATT  | AAAGAAATTT | AATAATTTTG  | AAAATGGA-T | TTTTTTGTTT  | 49  |
| PUMY065-1 | TGGCAAGAGC  | ATGAGAGCTT | TTACTGGGCA  | AGAAGACAAG | AGATGGAGAG  | 100 |
| PUMY065-2 | TGGCAAGAGC  | ATGAGAGCTT | TTACTGGGCA  | AGAAGACAAG | AGATGGAGAG  | 99  |
| PUMY065-1 | TCCAGCCGGG  | CCTGCGCTTA | AGTGC GCGGT | CTTGCTAGGC | TTGTAAGTTT  | 150 |
| PUMY065-2 | TCCAGCCGGG  | CCTGCGCTTA | AGTGC GCGGT | CTTGCTAGGC | TTGTAAGTTT  | 149 |
| PUMY065-1 | CTTTCTTGCT  | ATTCCAAACG | GTGAGAGATT  | TCTGTGCTTT | TGTTATAGGA  | 200 |
| PUMY065-2 | CTTTCTTGCT  | ATTCCAAACG | GTGAGAGATT  | TCTGTGCTTT | TGTTATAGGA  | 199 |
| PUMY065-1 | CAATTA AAC  | CGTTTCAATA | CAACACACTG  | TGGAGTTTTC | ATATCTTTGC  | 250 |
| PUMY065-2 | CAATTA AAC  | CGTTTCAATA | CAACACACTG  | TGGAGTTTTC | ATATCTTTGC  | 249 |
| PUMY065-1 | AAC TTTTCT  | TTGGGCATTC | GAGCAATCGG  | GGCCCAGAGG | TAACAAACAC  | 300 |
| PUMY065-2 | AAC TTTTCT  | TTGGGCATTC | GAGCAATCGG  | GGCCCAGAGG | TAACAAACAC  | 299 |
| PUMY065-1 | AAACAATTTT  | ATTTATTCAT | TAAATTTTGG  | TCAAAAACAA | GAATTTTCGT  | 350 |
| PUMY065-2 | AAACAATTTT  | ATTTATTCAT | TAAATTTTGG  | TCAAAAACAA | GAATTTTCGT  | 349 |
|           |             |            | 5.8S nrDNA  |            |             |     |
| PUMY065-1 | AAC TGGAAAT | TTTAAAATAT | TAAAAACTTT  | CAACAACGGA | TCTCTTG GTT | 400 |
| PUMY065-2 | AAC TGGAAAT | TTTAAAATAT | TAAAAACTTT  | CAACAACGGA | TCTCTTG GTT | 399 |
| PUMY065-1 | CTCGCATCGA  | TGAAGAACGC | AGCGAAATGC  | GATACGTAAT | GTGAATTGCA  | 450 |
| PUMY065-2 | CTCGCATCGA  | TGAAGAACGC | AGCGAAATGC  | GATACGTAAT | GTGAATTGCA  | 449 |
| PUMY065-1 | GAATTC CGTG | AATCATCGAA | TCTTTGAACG  | CACATTGCGC | CCCTTG GTAT | 500 |
| PUMY065-2 | GAATTC CGTG | AATCATCGAA | TCTTTGAACG  | CACATTGCGC | CCCTTG GTAT | 499 |
|           |             |            | ITS2        |            |             |     |
| PUMY065-1 | TCCAGGGGGC  | ATGCCTGTTT | GAGCGTCATT  | TCCTTCTCAA | ACATTCTGTT  | 550 |
| PUMY065-2 | TCCAGGGGGC  | ATGCCTGTTT | GAGCGTCATT  | TCCTTCTCAA | ACATTCTGTT  | 549 |
| PUMY065-1 | TGGTAGTGAG  | TGATACTCTT | TGGAGTTAAC  | TTGAAATTGC | TGGCCTTTTC  | 600 |
| PUMY065-2 | TGGTAGTGAG  | TGATACTCTT | TGGAGTTAAC  | TTGAAATTGC | TGGCCTTTTC  | 599 |
| PUMY065-1 | ATTGGATGTT  | TTTTTTCCAA | AGAGAGGTTT  | CTCTGCGTGC | TTGAGGTATA  | 650 |
| PUMY065-2 | ATTGGATGTT  | TTTTTTCCAA | AGAGAGGTTT  | CTCTGCGTGC | TTGAGGTATA  | 649 |
| PUMY065-1 | ATGCAAGTAC  | GGTCGTTTTA | GGTTTTACCA  | ACTGCGGCTA | ATCTTTTTTA  | 700 |
| PUMY065-2 | ATGCAAGTAC  | GGTCGTTTTA | GGTTTTACCA  | ACTGCGGCTA | ATCTTTTTTA  | 699 |
| PUMY065-1 | TACTGAGCGT  | ATTGGAACGT | TATCGATAAG  | AAGAGAGCGT | CTAGGCGAAC  | 750 |
| PUMY065-2 | TACTGAGCGT  | ATTGGAACGT | TATCGATAAG  | AAGAGAGCGT | CTAGGCGAAC  | 749 |
|           |             |            | 28S nrDNA   |            |             |     |
| PUMY065-1 | AATGTTCTTA  | AAGTTTGACC | TCAAATCAGG  | TAGGAGTACC | CGCTGAACTT  | 800 |
| PUMY065-2 | AATGTTCTTA  | AAGTTTGACC | TCAAATCAGG  | TAGGAGTACC | CGCTGAACTT  | 799 |
| PUMY065-1 | AA          |            |             |            |             | 802 |
| PUMY065-2 | AA          |            |             |            |             | 801 |

**Figure S2.** Multiple alignments of ITS sequences of the six yeast strains. The internal transcribed spacer regions ITS1 and ITS2 are highlighted in gray, and the intra-genomic polymorphic sites are indicated by solid black dots above the corresponding nucleotides.
